# Supplementary material for: Large optical anisotropy in noncentrosymmetric phosphate with pseudo 2D intercalated layer
Source: Royal Society of Chemistry journal article supplement (doi:10.1039/d4qi02245a), 2024-01-01
Supplement: d4qi02245a1.pdf [file d4qi02245a1.pdf]

## Supporting Information

### Large Optical Anisotropy in Noncentrosymmetric Phosphate with Pseudo 2D Intercalated Layer

Qiao Xia,<sup>‡a</sup> Xingxing Jiang,<sup>‡b</sup> Lu Qi,<sup>‡a</sup> Chao Wu,<sup>\*a</sup> Zheshuai Lin,<sup>b</sup> Zhipeng Huang,<sup>a</sup>  
Mark G. Humphrey,<sup>c</sup> Kazuyuki Tatsumi,<sup>a,d</sup> and Chi Zhang<sup>\*a</sup>

<sup>a</sup> China-Australia Joint Research Center for Functional Molecular Materials, School of Chemical Science and Engineering, Tongji University, Shanghai 200092, China

<sup>b</sup> Technical Institute of Physics and Chemistry, Chinese Academy of Sciences, Beijing 100190, China

<sup>c</sup> Research School of Chemistry, Australian National University, Canberra, ACT 2601, Australia

<sup>d</sup> Department of Chemistry, Graduate School of Science and Research Center for Materials Science, Nagoya University, Furo-Cho, Chikusa-ku, Nagoya 464-8602, Japan

<sup>‡</sup> These authors contributed equally to this work

## Table of Contents

|                                                                                                                                                                                                                                                                                                                                                                                            |    |
|--------------------------------------------------------------------------------------------------------------------------------------------------------------------------------------------------------------------------------------------------------------------------------------------------------------------------------------------------------------------------------------------|----|
| Table S1. Selected bond distances (Å) and angles (°) for (C <sub>4</sub> H <sub>7</sub> N <sub>2</sub> )(H <sub>2</sub> PO <sub>4</sub> ) .....                                                                                                                                                                                                                                            | 1  |
| Table S2. Selected bond distances (Å) and angles (°) for (C <sub>3</sub> H <sub>5</sub> N <sub>2</sub> )(H <sub>2</sub> PO <sub>4</sub> ) .....                                                                                                                                                                                                                                            | 2  |
| Table S3. Atomic Coordinates ( $\times 10^4$ ) and Equivalent Isotropic Displacement Parameters ( $\text{Å}^2 \times 10^3$ ) for (C <sub>4</sub> H <sub>7</sub> N <sub>2</sub> )(H <sub>2</sub> PO <sub>4</sub> ) and (C <sub>3</sub> H <sub>5</sub> N <sub>2</sub> )(H <sub>2</sub> PO <sub>4</sub> ). $U_{eq}$ is defined as 1/3 of the trace of the orthogonalised $U_{ij}$ tensor..... | 3  |
| Table S4. Hydrogen-bonding interactions for (C <sub>4</sub> H <sub>7</sub> N <sub>2</sub> )(H <sub>2</sub> PO <sub>4</sub> ) and (C <sub>3</sub> H <sub>5</sub> N <sub>2</sub> )(H <sub>2</sub> PO <sub>4</sub> )...                                                                                                                                                                       | 4  |
| Table S5. $\pi$ - $\pi$ stacking interactions in (C <sub>4</sub> H <sub>7</sub> N <sub>2</sub> )(H <sub>2</sub> PO <sub>4</sub> ) and (C <sub>3</sub> H <sub>5</sub> N <sub>2</sub> )(H <sub>2</sub> PO <sub>4</sub> ).....                                                                                                                                                                | 5  |
| Table S6. Optical properties for selected phase-matching UV NLO phosphates .....                                                                                                                                                                                                                                                                                                           | 6  |
| Table S7. The linear and nonlinear optical properties of (C <sub>3</sub> H <sub>5</sub> N <sub>2</sub> )(H <sub>2</sub> PO <sub>4</sub> ) were calculated by real-space atom cutting method .....                                                                                                                                                                                          | 7  |
| Figure S1. Unpolished photos of (C <sub>4</sub> H <sub>7</sub> N <sub>2</sub> )(H <sub>2</sub> PO <sub>4</sub> ) crystal (top) and (C <sub>3</sub> H <sub>5</sub> N <sub>2</sub> )(H <sub>2</sub> PO <sub>4</sub> ) crystal (bottom).....                                                                                                                                                  | 8  |
| Figure S2. Simulated and experimental powder X-ray diffraction patterns of (C <sub>4</sub> H <sub>7</sub> N <sub>2</sub> )(H <sub>2</sub> PO <sub>4</sub> ) (a) and (C <sub>3</sub> H <sub>5</sub> N <sub>2</sub> )(H <sub>2</sub> PO <sub>4</sub> ) (b).....                                                                                                                              | 9  |
| Figure S3. IR spectra of (C <sub>4</sub> H <sub>7</sub> N <sub>2</sub> )(H <sub>2</sub> PO <sub>4</sub> ) (a) and (C <sub>3</sub> H <sub>5</sub> N <sub>2</sub> )(H <sub>2</sub> PO <sub>4</sub> ) (b).....                                                                                                                                                                                | 10 |
| Figure S4. UV-Vis-NIR diffuse reflectance spectra of compound (C <sub>4</sub> H <sub>7</sub> N <sub>2</sub> )(H <sub>2</sub> PO <sub>4</sub> ) (a) and (C <sub>3</sub> H <sub>5</sub> N <sub>2</sub> )(H <sub>2</sub> PO <sub>4</sub> ) (b). The experimental optical band gaps are calculated by the Kubelka-Munk formula, $F(R) = (1 - R)^2/(2R)$ , where $R$ is the reflectance .....   | 11 |
| Figure S5. Thermogravimetry (TG) curve of (C <sub>4</sub> H <sub>7</sub> N <sub>2</sub> )(H <sub>2</sub> PO <sub>4</sub> ) (a) and (C <sub>3</sub> H <sub>5</sub> N <sub>2</sub> )(H <sub>2</sub> PO <sub>4</sub> ) (b) under a N <sub>2</sub> atmosphere .....                                                                                                                            | 12 |
| Figure S6. (a) Phase-matching curves of (C <sub>3</sub> H <sub>5</sub> N <sub>2</sub> )(H <sub>2</sub> PO <sub>4</sub> ) with 1064 nm laser radiation. (b) Oscilloscope traces of the SHG signals for powders of (C <sub>3</sub> H <sub>5</sub> N <sub>2</sub> )(H <sub>2</sub> PO <sub>4</sub> ) (105–150 $\mu\text{m}$ ) with 1064 nm laser radiation .....                              | 13 |
| Figure S7. Photograph of the crystal size of (C <sub>4</sub> H <sub>7</sub> N <sub>2</sub> )(H <sub>2</sub> PO <sub>4</sub> ) (a) and (C <sub>3</sub> H <sub>5</sub> N <sub>2</sub> )(H <sub>2</sub> PO <sub>4</sub> ) (b) .....                                                                                                                                                           | 14 |

**Table S1.** Selected bond distances (Å) and angles (°) for (C<sub>4</sub>H<sub>7</sub>N<sub>2</sub>)(H<sub>2</sub>PO<sub>4</sub>).

| Atom to atom         | Length (Å) | Atom to atom         | Length (Å) |
|----------------------|------------|----------------------|------------|
| P(1)-O(1)            | 1.5339(18) | P(1)-O(2)            | 1.5653(19) |
| P(1)-O(3)            | 1.515(2)   | P(1)-O(4)            | 1.5115(18) |
| N(1)-C(1)            | 1.463(3)   | N(1)-C(2)            | 1.321(3)   |
| N(1)-C(4)            | 1.367(4)   | N(2)-C(2)            | 1.310(3)   |
| N(2)-C(3)            | 1.358(4)   | C(3)-C(4)            | 1.336(4)   |
| Atom to atom to atom | Angle (°)  | Atom to atom to atom | Angle (°)  |
| O(1)-P(1)-O(2)       | 104.90(11) | O(1)-P(1)-O(3)       | 111.57(11) |
| O(1)-P(1)-O(4)       | 110.49(11) | O(2)-P(1)-O(3)       | 109.12(12) |
| O(2)-P(1)-O(4)       | 109.26(11) | O(3)-P(1)-O(4)       | 111.28(12) |
| C(1)-N(1)-C(2)       | 126.5(2)   | C(1)-N(1)-C(4)       | 125.7(2)   |
| C(2)-N(1)-C(4)       | 107.8(2)   | C(2)-N(2)-C(3)       | 108.7(2)   |
| N(1)-C(2)-N(2)       | 109.1(2)   | C(4)-C(3)-N(2)       | 107.1(3)   |
| C(3)-C(4)-N(1)       | 107.3(2)   |                      |            |

**Table S2.** Selected bond distances (Å) and angles (°) for (C<sub>3</sub>H<sub>5</sub>N<sub>2</sub>)(H<sub>2</sub>PO<sub>4</sub>).

| Atom to atom         | Length (Å) | Atom to atom         | Length (Å) |
|----------------------|------------|----------------------|------------|
| P(1)-O(1)            | 1.5043(15) | P(1)-O(2)            | 1.5630(17) |
| P(1)-O(3)            | 1.5059(19) | P(1)-O(4)            | 1.5739(18) |
| N(1)-C(1)            | 1.321(3)   | N(1)-C(2)            | 1.369(3)   |
| N(2)-C(1)            | 1.320(3)   | N(2)-C(3)            | 1.376(3)   |
| C(2)-C(3)            | 1.344(4)   |                      |            |
| Atom to atom to atom | Angle (°)  | Atom to atom to atom | Angle (°)  |
| O(1)-P(1)-O(2)       | 109.42(10) | O(1)-P(1)-O(3)       | 114.90(10) |
| O(1)-P(1)-O(4)       | 106.69(9)  | O(2)-P(1)-O(3)       | 107.19(10) |
| O(2)-P(1)-O(4)       | 107.35(10) | O(3)-P(1)-O(4)       | 111.05(11) |
| C(1)-N(1)-C(2)       | 108.4(2)   | C(1)-N(2)-C(3)       | 108.4(2)   |
| N(1)-C(1)-N(2)       | 109.0(2)   | N(1)-C(2)-C(3)       | 107.3(2)   |
| N(2)-C(3)-N(2)       | 106.8(2)   |                      |            |

**Table S3.** Atomic Coordinates ( $\times 10^4$ ) and Equivalent Isotropic Displacement Parameters ( $\text{\AA}^2 \times 10^3$ ) for  $(\text{C}_4\text{H}_7\text{N}_2)(\text{H}_2\text{PO}_4)$  and  $(\text{C}_3\text{H}_5\text{N}_2)(\text{H}_2\text{PO}_4)$ .  $U_{\text{eq}}$  is defined as 1/3 of the trace of the orthogonalised  $U_{ij}$  tensor.

| $(\text{C}_4\text{H}_7\text{N}_2)(\text{H}_2\text{PO}_4)$ |           |            |            |                                      |
|-----------------------------------------------------------|-----------|------------|------------|--------------------------------------|
| Atom                                                      | x         | y          | z          | $U_{(\text{eq})}$ ( $\text{\AA}^2$ ) |
| P(1)                                                      | 2544.2(8) | 5214.6(7)  | 364.8(7)   | 39.9(2)                              |
| O(1)                                                      | 3885(2)   | 6136(2)    | 1053(2)    | 53.4(5)                              |
| O(2)                                                      | 1546(2)   | 6120(2)    | -725(2)    | 58.4(6)                              |
| O(3)                                                      | 3275(2)   | 4047(2)    | -355(2)    | 58.3(6)                              |
| O(4)                                                      | 1419(2)   | 4734(2)    | 1396.7(17) | 52.1(5)                              |
| C(1)                                                      | 4369(4)   | 6960(3)    | 6907(3)    | 57.7(8)                              |
| C(2)                                                      | 3168(4)   | 6271(3)    | 4584(3)    | 49.6(7)                              |
| C(3)                                                      | 2163(4)   | 4322(3)    | 5021(3)    | 59.9(8)                              |
| C(4)                                                      | 2871(4)   | 4825(3)    | 6197(3)    | 59.9(8)                              |
| N(1)                                                      | 3499(3)   | 6053(2)    | 5911(2)    | 44.5(5)                              |
| N(2)                                                      | 2361(3)   | 5241(2)    | 4028(2)    | 49.1(6)                              |
| $(\text{C}_3\text{H}_5\text{N}_2)(\text{H}_2\text{PO}_4)$ |           |            |            |                                      |
| Atom                                                      | x         | y          | z          | $U_{(\text{eq})}$ ( $\text{\AA}^2$ ) |
| P(1)                                                      | 6728.3(6) | 5772.1(3)  | 7181.4(14) | 25.11(16)                            |
| O(1)                                                      | 7530(2)   | 6532.4(8)  | 6778(4)    | 35.5(4)                              |
| O(2)                                                      | 7669(2)   | 5304.8(9)  | 9463(4)    | 32.9(4)                              |
| O(3)                                                      | 6635(2)   | 5286.9(10) | 4556(4)    | 38.2(4)                              |
| O(4)                                                      | 5000(2)   | 5936.4(9)  | 8408(4)    | 35.5(4)                              |
| C(1)                                                      | 5351(3)   | 7570.4(14) | 1587(5)    | 33.9(6)                              |
| C(2)                                                      | 5861(3)   | 8787.1(14) | 1852(7)    | 39.9(6)                              |
| C(3)                                                      | 6782(3)   | 8432.8(14) | 3787(6)    | 39.8(6)                              |
| N(1)                                                      | 4980(2)   | 8239.6(11) | 490(5)     | 33.9(5)                              |
| N(2)                                                      | 6441(2)   | 7668.2(12) | 3591(5)    | 36.4(5)                              |

**Table S4.** Hydrogen-bonding interactions for (C<sub>4</sub>H<sub>7</sub>N<sub>2</sub>)(H<sub>2</sub>PO<sub>4</sub>) and (C<sub>3</sub>H<sub>5</sub>N<sub>2</sub>)(H<sub>2</sub>PO<sub>4</sub>).

| (C <sub>4</sub> H <sub>7</sub> N <sub>2</sub> )(H <sub>2</sub> PO <sub>4</sub> ) |                |                  |                  |        |
|----------------------------------------------------------------------------------|----------------|------------------|------------------|--------|
| D-H...A                                                                          | <i>d</i> (D-H) | <i>d</i> (H...A) | <i>d</i> (D...A) | ∠(DHA) |
| N(2)-H(2)...O(4)                                                                 | 1.05           | 1.44             | 2.491(2)         | 175    |
| O(1)-H(1)...O(3)                                                                 | 0.86           | 1.81             | 2.668(3)         | 171    |
| O(2)-H(2B)...O(4)                                                                | 0.82           | 1.78             | 2.591(2)         | 169    |
| C(3)-H(3)...O(1)                                                                 | 0.93           | 2.56             | 3.428(4)         | 157    |
| C(4)-H(4)...O(3)                                                                 | 0.93           | 2.56             | 3.455(4)         | 162    |
| (C <sub>3</sub> H <sub>5</sub> N <sub>2</sub> )(H <sub>2</sub> PO <sub>4</sub> ) |                |                  |                  |        |
| D-H...A                                                                          | <i>d</i> (D-H) | <i>d</i> (H...A) | <i>d</i> (D...A) | ∠(DHA) |
| N(1)-H(1)...O(1)                                                                 | 0.86           | 1.86             | 2.714(3)         | 169    |
| N(2)-H(2)...O(1)                                                                 | 0.86           | 1.80             | 2.657(3)         | 174    |
| O(2)-H(2B)...O(3)                                                                | 0.82           | 1.75             | 2.553(3)         | 166    |
| O(4)-H(4)...O(3)                                                                 | 0.82           | 1.79             | 2.599(2)         | 169    |
| C(1)-H(1A)...O(4)                                                                | 0.93           | 2.40             | 3.252(3)         | 152    |
| C(2)-H(2A)...O(2)                                                                | 0.93           | 2.56             | 3.180(3)         | 124    |

**Table S5.**  $\pi$ - $\pi$  stacking interactions in  $(C_4H_7N_2)(H_2PO_4)$  and  $(C_3H_5N_2)(H_2PO_4)$ .

| $(C_4H_7N_2)(H_2PO_4)$ |              |          |        |          |             |                |
|------------------------|--------------|----------|--------|----------|-------------|----------------|
| Number                 | Cg(I)->Cg(J) | <i>D</i> | $\eta$ | <i>d</i> | $\vartheta$ | Strong or Weak |
| 1                      | Cg(1)->Cg(1) | 4.627    | 0      | 3.704    | 36.82       | weak           |
| 2                      | Cg(1)->Cg(1) | 3.679    | 0      | 3.537    | 15.98       | strong         |
| $(C_3H_5N_2)(H_2PO_4)$ |              |          |        |          |             |                |
| Number                 | Cg(I)->Cg(J) | <i>D</i> | $\eta$ | <i>d</i> | $\vartheta$ | Strong or Weak |
| 1                      | Cg(1)->Cg(1) | 4.720    | 0      | 3.197    | 47.38       | weak           |
| 2                      | Cg(1)->Cg(1) | 4.720    | 0      | 3.197    | 47.38       | weak           |
| 3                      | Cg(1)->Cg(1) | 4.720    | 12.08  | 2.786    | 53.82       | weak           |
| 4                      | Cg(1)->Cg(1) | 4.720    | 12.08  | 3.259    | 46.33       | weak           |

Note: 1. Cg(I) represents the center of mass(I) of the five-membered ring imidazole plane, and the coordinates of Cg(1) are (0.28, 0.53, 0.51) and (0.59, 0.81, 0.23) in  $(C_4H_7N_2)(H_2PO_4)$  and  $(C_3H_5N_2)(H_2PO_4)$ , respectively; 2. *D*: the distance between the centroids of the rings (Å); 3.  $\eta$ : the dihedral angle (°) between plane I and J; 4. *d*: vertical distance between adjacent imidazole planes (Å); 5.  $\vartheta$ : displacement angle, the angle between the connection of adjacent centroids and the vertical line formed by the corresponding plane (°).

**Table S6.** Optical properties for selected phase-matching UV NLO phosphates.

| Compound                                                                                                                                          | Space Group                                           | $\Delta n$ at 1064 nm             | Reference |
|---------------------------------------------------------------------------------------------------------------------------------------------------|-------------------------------------------------------|-----------------------------------|-----------|
| KH <sub>2</sub> PO <sub>4</sub> (KDP)                                                                                                             | <i>I</i> 42 <i>d</i>                                  | 0.034 <sup>[b]</sup>              | 36        |
| KTiOPO <sub>4</sub> (KTP)                                                                                                                         | <i>Pna</i> 2 <sub>1</sub>                             | 0.0921 <sup>[b]</sup>             | 35        |
| LAP                                                                                                                                               | <i>P</i> 2 <sub>1</sub>                               | 0.075 <sup>[b]</sup>              | 87        |
| Ba <sub>3</sub> P <sub>3</sub> O <sub>10</sub> Cl                                                                                                 | <i>Pca</i> 2 <sub>1</sub>                             | 0.028 <sup>[a]</sup>              | 16        |
| Ba <sub>3</sub> P <sub>3</sub> O <sub>10</sub> Br                                                                                                 | <i>P</i> 2 <sub>1</sub> 2 <sub>1</sub> 2 <sub>1</sub> | 0.023 <sup>[a]</sup>              | 16        |
| RbMgPO <sub>4</sub> ·6H <sub>2</sub> O                                                                                                            | <i>Pmn</i> 2 <sub>1</sub>                             | 0.005 <sup>[a]</sup>              | 17        |
| CsMgPO <sub>4</sub> ·6H <sub>2</sub> O                                                                                                            | <i>P</i> 6 <sub>3</sub> / <i>mmc</i>                  | 0.006 <sup>[a]</sup>              | 17        |
| NH <sub>4</sub> MgPO <sub>4</sub> ·6H <sub>2</sub> O                                                                                              | <i>Pmn</i> 2 <sub>1</sub>                             | 0.0063 <sup>[a]</sup>             | 18        |
| KMgPO <sub>4</sub> ·6H <sub>2</sub> O                                                                                                             | <i>Pmn</i> 2 <sub>1</sub>                             | 0.01 <sup>[a]</sup>               | 18        |
| LiCs <sub>2</sub> PO <sub>4</sub>                                                                                                                 | <i>Cmc</i> 2 <sub>1</sub>                             | 0.01 <sup>[a]</sup>               | 85        |
| RbNaMgP <sub>2</sub> O <sub>7</sub> (LTP)                                                                                                         | <i>Pna</i> 2 <sub>1</sub>                             | 0.031 at 532 nm <sup>[a]</sup>    | 21        |
| RbNaMgP <sub>2</sub> O <sub>7</sub> (HTP)                                                                                                         | <i>Ccm</i> 2 <sub>1</sub>                             | 0.035 at 532 nm <sup>[a]</sup>    | 21        |
| NaNH <sub>4</sub> PO <sub>3</sub> F·H <sub>2</sub> O                                                                                              | <i>Pc</i>                                             | 0.053 at 589.3 nm <sup>[b]</sup>  | 84        |
| RbTiOPO <sub>4</sub>                                                                                                                              | <i>Pna</i> 2 <sub>1</sub>                             | 0.0884 <sup>[b]</sup>             | 36        |
| Na <sub>3</sub> TaP <sub>2</sub> O <sub>9</sub>                                                                                                   | <i>P</i> 2 <sub>1</sub> 2 <sub>1</sub> 2 <sub>1</sub> | 0.1101 (static) <sup>[a]</sup>    | 37        |
| K <sub>2</sub> ZnMoP <sub>2</sub> O <sub>10</sub>                                                                                                 | <i>P</i> 2 <sub>1</sub> 2 <sub>1</sub> 2 <sub>1</sub> | 0.0534 at 450.2 nm <sup>[b]</sup> | 38        |
| Na <sub>12</sub> (NbO) <sub>3</sub> (PO <sub>4</sub> ) <sub>7</sub>                                                                               | <i>Pna</i> 2 <sub>1</sub>                             | 0.03 (static) <sup>[a]</sup>      | 39        |
| Rb <sub>3</sub> PbBi(P <sub>2</sub> O <sub>7</sub> ) <sub>2</sub>                                                                                 | <i>P</i> 2 <sub>1</sub> 2 <sub>1</sub> 2 <sub>1</sub> | 0.031 <sup>[b]</sup>              | 40        |
| Cs <sub>3</sub> PbBi(P <sub>2</sub> O <sub>7</sub> ) <sub>2</sub>                                                                                 | <i>P</i> 2 <sub>1</sub> 2 <sub>1</sub> 2 <sub>1</sub> | 0.02 <sup>[b]</sup>               | 40        |
| Rb <sub>3</sub> BaBi(P <sub>2</sub> O <sub>7</sub> ) <sub>2</sub>                                                                                 | <i>P</i> 2 <sub>1</sub>                               | 0.025 <sup>[a]</sup>              | 41        |
| Cs <sub>3</sub> BaBi(P <sub>2</sub> O <sub>7</sub> ) <sub>2</sub>                                                                                 | <i>P</i> 2 <sub>1</sub> 2 <sub>1</sub> 2 <sub>1</sub> | 0.025 <sup>[a]</sup>              | 41        |
| K <sub>2</sub> Sb(P <sub>2</sub> O <sub>7</sub> )F                                                                                                | <i>P</i> 4 <i>bm</i>                                  | 0.157 at 546 nm <sup>[b]</sup>    | 42        |
| Rb <sub>2</sub> Sb(P <sub>2</sub> O <sub>7</sub> )F                                                                                               | <i>P</i> 4 <i>bm</i>                                  | 0.15 at 546 nm <sup>[b]</sup>     | 43        |
| Sn <sub>2</sub> PO <sub>4</sub> Cl                                                                                                                | <i>Pna</i> 2 <sub>1</sub>                             | 0.162 at 546 nm <sup>[b]</sup>    | 44        |
| $\beta$ -Cd(PO <sub>3</sub> ) <sub>2</sub>                                                                                                        | <i>P</i> 2 <sub>1</sub> 2 <sub>1</sub> 2 <sub>1</sub> | 0.059 <sup>[a]</sup>              | 1         |
| (NH <sub>4</sub> ) <sub>3</sub> (H <sub>3</sub> O)Zn <sub>4</sub> (PO <sub>4</sub> ) <sub>4</sub>                                                 | <i>P</i> 6 <sub>3</sub>                               | 0.032 <sup>[a]</sup>              | 45        |
| LiHgPO <sub>4</sub>                                                                                                                               | <i>P</i> 42 <sub>1</sub> <i>m</i>                     | 0.068 <sup>[b]</sup>              | 46        |
| [C(NH <sub>2</sub> ) <sub>3</sub> ] <sub>6</sub> (PO <sub>4</sub> ) <sub>2</sub> ·3H <sub>2</sub> O                                               | <i>Cc</i>                                             | 0.078 at 546 nm <sup>[b]</sup>    | 55        |
| 4HPP                                                                                                                                              | <i>P</i> 2 <sub>1</sub> 2 <sub>1</sub> 2 <sub>1</sub> | 0.25 <sup>[a]</sup>               | 50        |
| 2APP                                                                                                                                              | <i>P</i> 2 <sub>1</sub>                               | 0.225 <sup>[b]</sup>              | 51        |
| [C(NH <sub>2</sub> ) <sub>3</sub> ] <sub>2</sub> PO <sub>3</sub> F                                                                                | <i>Cm</i>                                             | 0.039 at 532 nm <sup>[a]</sup>    | 52        |
| [C(NH <sub>2</sub> ) <sub>3</sub> ] <sub>3</sub> PO <sub>4</sub> ·2H <sub>2</sub> O                                                               | <i>Pna</i> 2 <sub>1</sub>                             | 0.055 at 546 nm <sup>[b]</sup>    | 49        |
| (C <sub>3</sub> H <sub>7</sub> N <sub>6</sub> ) <sub>6</sub> (H <sub>2</sub> PO <sub>4</sub> ) <sub>4</sub> (HPO <sub>4</sub> )·4H <sub>2</sub> O | <i>P</i> 2 <sub>1</sub>                               | 0.220 <sup>[a]</sup>              | 53        |
| (C <sub>3</sub> H <sub>5</sub> N <sub>2</sub> )(H <sub>2</sub> PO <sub>4</sub> )                                                                  | <i>Pna</i> 2 <sub>1</sub>                             | 0.15 at 546 nm <sup>[b]</sup>     | this work |

Notes:

[a] Cal. Birefringence

[b] Exp. Birefringence

LAP: (H<sub>2</sub>N)<sub>2</sub>CNH(CH<sub>2</sub>)<sub>3</sub>CH(NH<sub>3</sub>)COO·H<sub>2</sub>PO<sub>4</sub>·H<sub>2</sub>O4HPP: (C<sub>5</sub>H<sub>6</sub>ON)(H<sub>2</sub>PO<sub>4</sub>)2APP: (C<sub>4</sub>H<sub>6</sub>N<sub>3</sub>)(H<sub>2</sub>PO<sub>3</sub>)



**Table S7.** The linear and nonlinear optical properties of  $(\text{C}_3\text{H}_5\text{N}_2)(\text{H}_2\text{PO}_4)$  were calculated by real-space atom cutting method.

|                                                                                       | Total  | $[\text{C}_3\text{H}_5\text{N}_2]^+$ | $[\text{H}_2\text{PO}_4]^-$ |
|---------------------------------------------------------------------------------------|--------|--------------------------------------|-----------------------------|
| $n_x$                                                                                 | 1.51   | 1.42                                 | 1.22                        |
| $n_y$                                                                                 | 1.578  | 1.46                                 | 1.22                        |
| $n_z$                                                                                 | 1.50   | 1.40                                 | 1.20                        |
| $(\text{C}_3\text{H}_5\text{N}_2)(\text{H}_2\text{PO}_4)$ $\Delta n @ 546 \text{ nm}$ | 0.078  | 0.057 (78.08%) <sup>a</sup>          | 0.016 (21.92%)              |
| $d_{15}$                                                                              | -0.045 | 0.034                                | -0.053                      |
| $d_{24}$                                                                              | 0.19   | 0.11                                 | 0.25                        |
| $d_{33}$                                                                              | -0.49  | -0.35 (55.56%) <sup>b</sup>          | -0.28 (44.44%)              |

Notes:

$d$  values in pm/V.

<sup>a</sup>The percentage in the table represents the contribution of each component to  $\Delta n$ .

<sup>b</sup>The percentage in the table represents the contribution of each component to  $d_{33}$ .

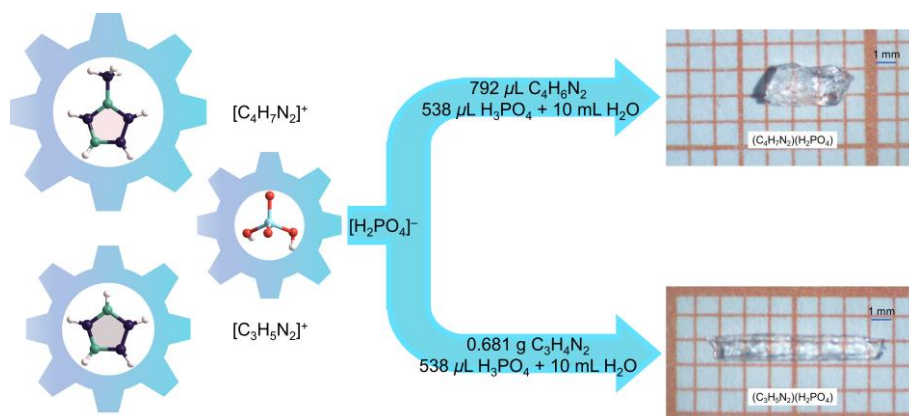

**Figure S1.** Unpolished photos of  $(C_4H_7N_2)(H_2PO_4)$  crystal (top) and  $(C_3H_5N_2)(H_2PO_4)$  crystal (bottom).

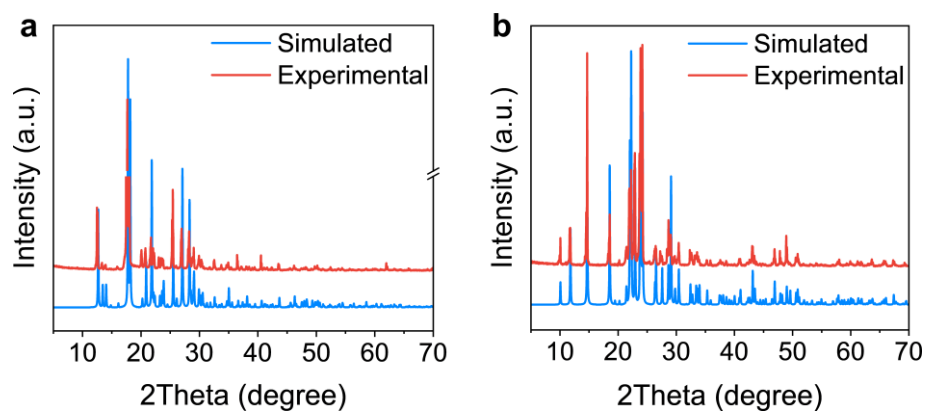

**Figure S2.** Simulated and experimental powder X-ray diffraction patterns of  $(C_4H_7N_2)(H_2PO_4)$  (a) and  $(C_3H_5N_2)(H_2PO_4)$  (b).

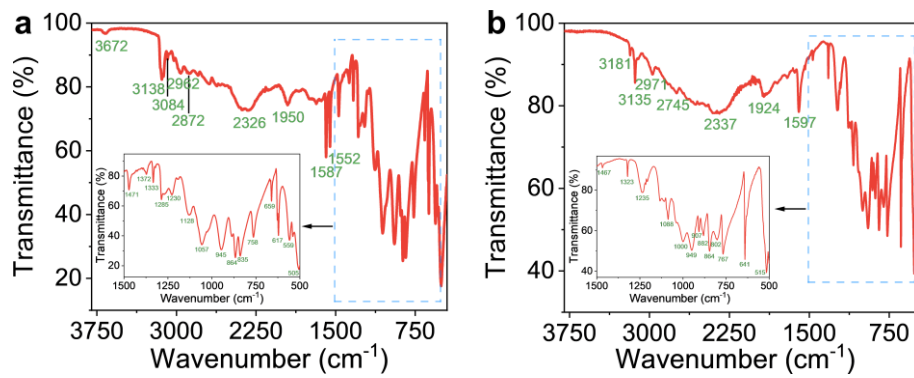

**Figure S3.** IR spectra of (C<sub>4</sub>H<sub>7</sub>N<sub>2</sub>)(H<sub>2</sub>PO<sub>4</sub>) (a) and (C<sub>3</sub>H<sub>5</sub>N<sub>2</sub>)(H<sub>2</sub>PO<sub>4</sub>) (b).

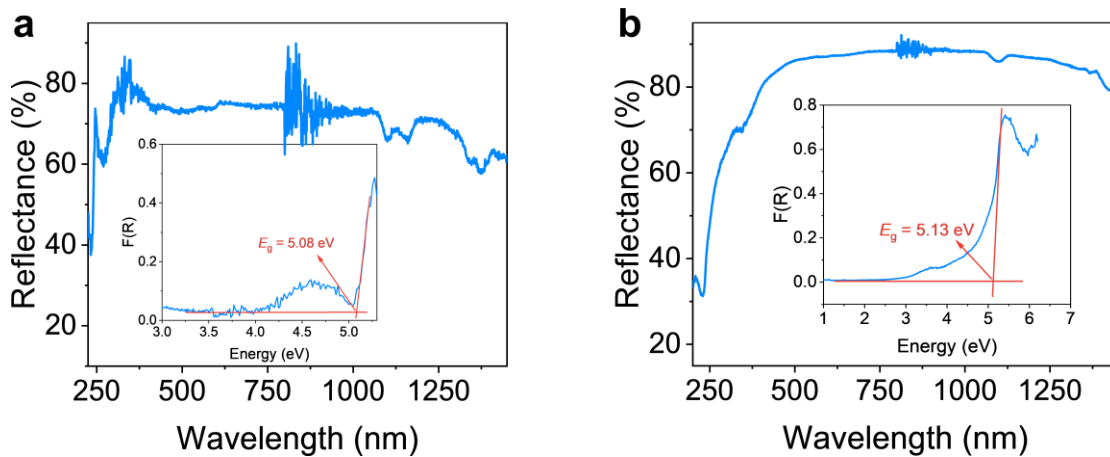

**Figure S4.** UV-Vis-NIR diffuse reflectance spectra of compound  $(C_4H_7N_2)(H_2PO_4)$  (a) and  $(C_3H_5N_2)(H_2PO_4)$  (b). The experimental optical band gaps are calculated by the Kubelka-Munk formula,  $F(R) = (1 - R)^2/(2R)$ , where  $R$  is the reflectance.

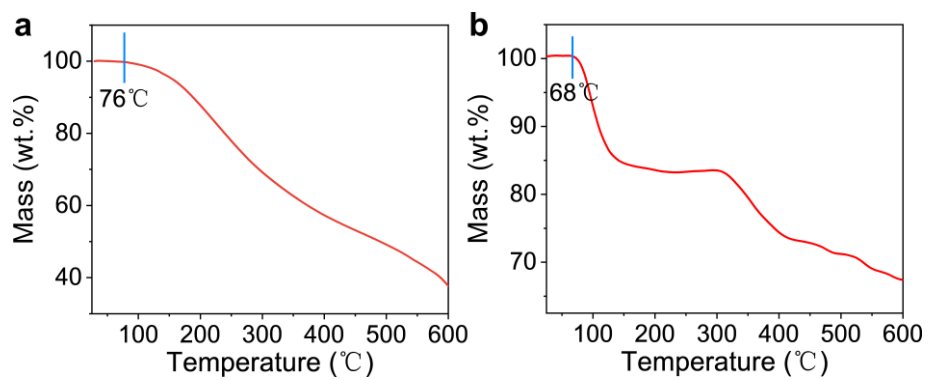

**Figure S5.** Thermogravimetry (TG) curve of  $(C_4H_7N_2)(H_2PO_4)$  (a) and  $(C_3H_5N_2)(H_2PO_4)$  (b) under a  $N_2$  atmosphere.

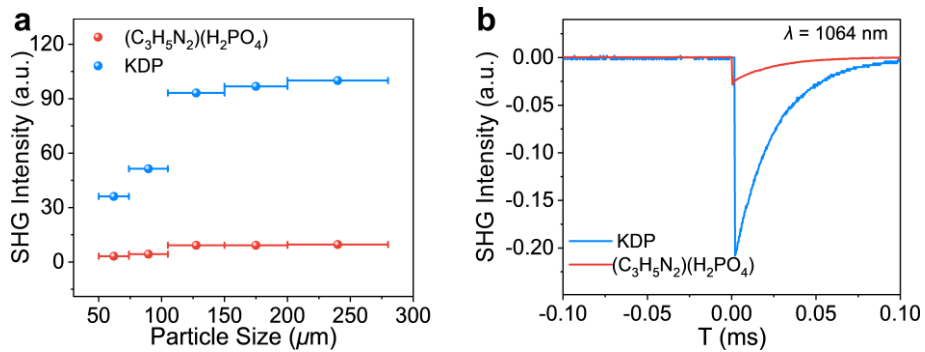

**Figure S6.** (a) Phase-matching curves of  $(\text{C}_3\text{H}_5\text{N}_2)(\text{H}_2\text{PO}_4)$  with 1064 nm laser radiation. (b) Oscilloscope traces of the SHG signals for powders of  $(\text{C}_3\text{H}_5\text{N}_2)(\text{H}_2\text{PO}_4)$  (105–150  $\mu\text{m}$ ) with 1064 nm laser radiation.

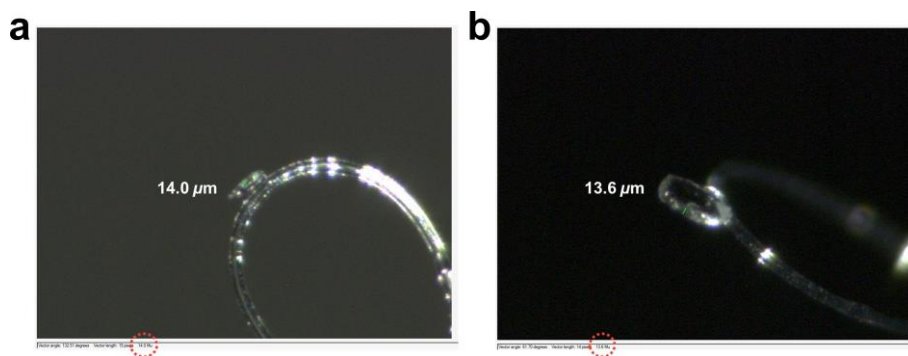

**Figure S7.** Photograph of the crystal size of  $(C_4H_7N_2)(H_2PO_4)$  (a) and  $(C_3H_5N_2)(H_2PO_4)$  (b).
